# Supplementary material
Source: PubMed Central journal article supplement (PMC6365822)

## 1 **Supplementary information**

2 Table S1. Genome accession numbers and sequence types of *Campylobacter jejuni* isolates  
3 sequenced in this study. Sequence types novel to the PubMLST database are indicated in  
4 boldface.

5 Figure S1. Phylogenomic tree based on the core genome alignment (942 core genes) of 1261 *C.*  
6 *jejuni* genomes listed in Supplementary Dataset S1.

7 Figure S2. Neighbor-joining tree representing the alignment of nucleotide sequences of the beta-  
8 lactamase (*bla-OXA*) gene. Sequence accession number, *Campylobacter* sp., and strain number  
9 are indicated for each sequence and with allele number when available. Strains from this study  
10 are indicated in boldface and with CB for western jackdaw, SO or SS for mallard duck, and FA  
11 for pheasant in the strain name.

12 Figure S3. goeBURST full Minimum spanning tree (MST) of MLST allelic profiles of *C. jejuni*  
13 STs detected from different hosts (2, 5, 7, 16, 18, 19, 29). Mallard duck (brown) and barnacle  
14 geese (purple) STs are mostly located in their own clade. STs from western jackdaw also form a  
15 separate clade. The most common clonal complexes (CCs) associated with domestic animals and  
16 human patients are indicated. Also, the most frequent STs among western jackdaws (ST-1282  
17 and ST-6460), mallard ducks (ST-2314), and pheasants (ST-19) are indicated with arrows.

## 18 **References**

- 19 **2. Llarena AK, Huneau A, Hakkinen M, Hänninen M-L.** 2015. Predominant *Campylobacter*  
20 *jejuni* sequence types persist in Finnish chicken production. *PLoS One* 10:e0116585.  
21 doi:10.1371/journal.pone.0116585.
- 22 **5. Mohan V, Stevenson M, Marshall J, Fearnhead P, Holland BR, Hotter G, French NP.**  
23 2013. *Campylobacter jejuni* colonization and population structure in urban populations of ducks  
24 and starlings in New Zealand. *MicrobiologyOpen* 2:659-673. doi:10.1002/mbo3.102.
- 25 **7. Llarena AK, Skarp-de Haan CP, Rossi M, Hänninen M-L.** 2015. Characterization of the  
26 *Campylobacter jejuni* population in the barnacle geese reservoir. *Zoonoses Public Health* 62:209-  
27 221. doi:10.1111/zph.12141.
- 28 **16. Griekspoor P, Colles FM, McCarthy ND, Hansbro PM, Ashhurst-Smith C, Olsen B,**  
29 **Hasselquist D, Maiden MC, Waldenstrom J.** 2013. Marked host specificity and lack of  
30 phylogeographic population structure of *Campylobacter jejuni* in wild birds. *Mol Ecol* 22:1463-  
31 1472. doi:10.1111/mec.12144.
- 32 **18. de Haan CP, Kivistö R, Hakkinen M, Rautelin H, Hänninen M-L.** 2010. Decreasing  
33 trend of overlapping multilocus sequence types between human and chicken *Campylobacter*  
34 *jejuni* isolates over a decade in Finland. *Appl Environ Microbiol* 76:5228-5236.  
35 doi:10.1128/AEM.00581-10.
- 36 **19. Kovanen SM, Kivistö RI, Rossi M, Schott T, Kärkkäinen UM, Tuuminen T, Uksila J,**  
37 **Rautelin H, Hänninen M-L.** 2014. Multilocus sequence typing (MLST) and whole-genome

38 MLST of *Campylobacter jejuni* isolates from human infections in three districts during a  
39 seasonal peak in Finland. *J Clin Microbiol* 52:4147-4154. doi:10.1128/JCM.01959-14.

40 29. **de Haan CP, Kivistö RI, Hakkinen M, Corander J, Hänninen M-L.** 2010. Multilocus  
41 sequence types of Finnish bovine *Campylobacter jejuni* isolates and their attribution to human  
42 infections. *BMC Microbiol* 10:200-2180-10-200. doi:10.1186/1471-2180-10-200.

| BioSample    | Accession    | Organism                    | Strain | Source                 | Sequence type (ST) | Clonal complex (CC) |
|--------------|--------------|-----------------------------|--------|------------------------|--------------------|---------------------|
| SAMN08398758 | PRCT00000000 | <i>Campylobacter jejuni</i> | CB286  | <i>Corvus monedula</i> | 6460               | UA                  |
| SAMN08398759 | PRCS00000000 | <i>Campylobacter jejuni</i> | CB287  | <i>Corvus monedula</i> | <b>7803</b>        | UA                  |
| SAMN08398760 | PRCR00000000 | <i>Campylobacter jejuni</i> | CB288  | <i>Corvus monedula</i> | 1282               | UA                  |
| SAMN08398761 | PRCQ00000000 | <i>Campylobacter jejuni</i> | CB289  | <i>Corvus monedula</i> | <b>7804</b>        | UA                  |
| SAMN08398762 | PRCP00000000 | <i>Campylobacter jejuni</i> | CB290  | <i>Corvus monedula</i> | <b>7805</b>        | UA                  |
| SAMN08398763 | PRCO00000000 | <i>Campylobacter jejuni</i> | CB291  | <i>Corvus monedula</i> | <b>7806</b>        | UA                  |
| SAMN08398764 | PRCN00000000 | <i>Campylobacter jejuni</i> | CB293  | <i>Corvus monedula</i> | <b>7808</b>        | ST-952              |
| SAMN08398765 | PRCM00000000 | <i>Campylobacter jejuni</i> | CB294  | <i>Corvus monedula</i> | 6460               | UA                  |
| SAMN08398766 | PRCL00000000 | <i>Campylobacter jejuni</i> | CB295  | <i>Corvus monedula</i> | 6518               | UA                  |
| SAMN08398767 | PRCK00000000 | <i>Campylobacter jejuni</i> | CB296  | <i>Corvus monedula</i> | <b>7808</b>        | ST-952              |
| SAMN08398768 | PRCJ00000000 | <i>Campylobacter jejuni</i> | CB297  | <i>Corvus monedula</i> | <b>7810</b>        | UA                  |
| SAMN08398769 | PRCI00000000 | <i>Campylobacter jejuni</i> | CB299  | <i>Corvus monedula</i> | 1282               | UA                  |
| SAMN08398770 | PRCH00000000 | <i>Campylobacter jejuni</i> | CB300  | <i>Corvus monedula</i> | <b>7811</b>        | UA                  |
| SAMN08398771 | PRCG00000000 | <i>Campylobacter jejuni</i> | CB301  | <i>Corvus monedula</i> | <b>8808</b>        | UA                  |
| SAMN08398772 | PRCF00000000 | <i>Campylobacter jejuni</i> | CB302  | <i>Corvus monedula</i> | 4875               | UA                  |
| SAMN08398773 | PRCE00000000 | <i>Campylobacter jejuni</i> | CB304  | <i>Corvus monedula</i> | <b>7813</b>        | UA                  |
| SAMN08398774 | PRCD00000000 | <i>Campylobacter jejuni</i> | CB305  | <i>Corvus monedula</i> | <b>7814</b>        | UA                  |
| SAMN08398775 | PRCC00000000 | <i>Campylobacter jejuni</i> | CB306  | <i>Corvus monedula</i> | <b>7815</b>        | UA                  |
| SAMN08398776 | PRCB00000000 | <i>Campylobacter jejuni</i> | CB307  | <i>Corvus monedula</i> | <b>7813</b>        | UA                  |
| SAMN08398777 | PRCA00000000 | <i>Campylobacter jejuni</i> | CB308  | <i>Corvus monedula</i> | <b>7817</b>        | UA                  |
| SAMN08398778 | PRBZ00000000 | <i>Campylobacter jejuni</i> | CB309  | <i>Corvus monedula</i> | <b>7815</b>        | UA                  |
| SAMN08398779 | PRBY00000000 | <i>Campylobacter jejuni</i> | CB310  | <i>Corvus monedula</i> | 4875               | UA                  |
| SAMN08398780 | PRBX00000000 | <i>Campylobacter jejuni</i> | CB311  | <i>Corvus monedula</i> | <b>7819</b>        | UA                  |
| SAMN08398781 | PRBW00000000 | <i>Campylobacter jejuni</i> | CB312  | <i>Corvus monedula</i> | 4875               | UA                  |
| SAMN08398782 | PRBV00000000 | <i>Campylobacter jejuni</i> | CB313  | <i>Corvus monedula</i> | <b>7820</b>        | UA                  |
| SAMN08398783 | PRBU00000000 | <i>Campylobacter jejuni</i> | CB316  | <i>Corvus monedula</i> | <b>7821</b>        | UA                  |
| SAMN08398784 | PRBT00000000 | <i>Campylobacter jejuni</i> | CB317  | <i>Corvus monedula</i> | 6589               | UA                  |
| SAMN08398785 | PRBS00000000 | <i>Campylobacter jejuni</i> | CB318  | <i>Corvus monedula</i> | <b>7822</b>        | UA                  |
| SAMN08398786 | PRBR00000000 | <i>Campylobacter jejuni</i> | CB319  | <i>Corvus monedula</i> | <b>7823</b>        | UA                  |
| SAMN08398787 | PRBQ00000000 | <i>Campylobacter jejuni</i> | CB322  | <i>Corvus monedula</i> | <b>7824</b>        | UA                  |
| SAMN08398788 | PRBP00000000 | <i>Campylobacter jejuni</i> | CB329  | <i>Corvus monedula</i> | 6460               | UA                  |
| SAMN08398789 | PRBO00000000 | <i>Campylobacter jejuni</i> | CB331  | <i>Corvus monedula</i> | <b>7825</b>        | UA                  |
| SAMN08398790 | PRBN00000000 | <i>Campylobacter jejuni</i> | CB332  | <i>Corvus monedula</i> | <b>7826</b>        | UA                  |
| SAMN08398791 | PRBM00000000 | <i>Campylobacter jejuni</i> | CB333  | <i>Corvus monedula</i> | <b>7808</b>        | ST-952              |
| SAMN08398792 | PRBL00000000 | <i>Campylobacter jejuni</i> | CB334  | <i>Corvus monedula</i> | <b>7828</b>        | UA                  |
| SAMN08398793 | PRBK00000000 | <i>Campylobacter jejuni</i> | CB335  | <i>Corvus monedula</i> | <b>7820</b>        | UA                  |
| SAMN08398794 | PRBJ00000000 | <i>Campylobacter jejuni</i> | CB336  | <i>Corvus monedula</i> | 1539               | UA                  |
| SAMN08398795 | PRBI00000000 | <i>Campylobacter jejuni</i> | CB338  | <i>Corvus monedula</i> | 6590               | UA                  |
| SAMN08398796 | PRBH00000000 | <i>Campylobacter jejuni</i> | CB339  | <i>Corvus monedula</i> | 1483               | UA                  |
| SAMN08398797 | PRBG00000000 | <i>Campylobacter jejuni</i> | CB340  | <i>Corvus monedula</i> | <b>7830</b>        | UA                  |
| SAMN08398798 | PRBF00000000 | <i>Campylobacter jejuni</i> | CB341  | <i>Corvus monedula</i> | 4565               | UA                  |
| SAMN08398799 | PRBE00000000 | <i>Campylobacter jejuni</i> | CB342  | <i>Corvus monedula</i> | <b>7831</b>        | UA                  |
| SAMN08398800 | PRBD00000000 | <i>Campylobacter jejuni</i> | CB343  | <i>Corvus monedula</i> | 1752               | ST-952              |
| SAMN08398801 | PRBC00000000 | <i>Campylobacter jejuni</i> | CB344  | <i>Corvus monedula</i> | <b>7832</b>        | UA                  |
| SAMN08398802 | PRBB00000000 | <i>Campylobacter jejuni</i> | CB345  | <i>Corvus monedula</i> | 6460               | UA                  |
| SAMN08398803 | PRBA00000000 | <i>Campylobacter jejuni</i> | CB346  | <i>Corvus monedula</i> | 1282               | UA                  |
| SAMN08398804 | PRAZ00000000 | <i>Campylobacter jejuni</i> | CB347  | <i>Corvus monedula</i> | 1282               | UA                  |
| SAMN08398805 | PRAY00000000 | <i>Campylobacter jejuni</i> | CB348  | <i>Corvus monedula</i> | <b>7833</b>        | UA                  |
| SAMN08398806 | PRAX00000000 | <i>Campylobacter jejuni</i> | CB349  | <i>Corvus monedula</i> | <b>7834</b>        | ST-952              |
| SAMN08398807 | PRAW00000000 | <i>Campylobacter jejuni</i> | CB350  | <i>Corvus monedula</i> | 1282               | UA                  |
| SAMN08398808 | PRAV00000000 | <i>Campylobacter jejuni</i> | CB352  | <i>Corvus monedula</i> | <b>7835</b>        | UA                  |
| SAMN08398809 | PRAU00000000 | <i>Campylobacter jejuni</i> | CB353  | <i>Corvus monedula</i> | 1319               | UA                  |
| SAMN08398810 | PRAT00000000 | <i>Campylobacter jejuni</i> | CB354  | <i>Corvus monedula</i> | <b>7836</b>        | UA                  |
| SAMN08398811 | PRAS00000000 | <i>Campylobacter jejuni</i> | CB355  | <i>Corvus monedula</i> | <b>7837</b>        | UA                  |
| SAMN08398812 | PRAR00000000 | <i>Campylobacter jejuni</i> | CB357  | <i>Corvus monedula</i> | <b>7831</b>        | UA                  |
| SAMN08398813 | PRAQ00000000 | <i>Campylobacter jejuni</i> | CB358  | <i>Corvus monedula</i> | 6460               | UA                  |
| SAMN08398814 | PRAP00000000 | <i>Campylobacter jejuni</i> | CB359  | <i>Corvus monedula</i> | 1483               | UA                  |
| SAMN08398815 | PRAO00000000 | <i>Campylobacter jejuni</i> | CB360  | <i>Corvus monedula</i> | <b>7840</b>        | UA                  |
| SAMN08398816 | PRAN00000000 | <i>Campylobacter jejuni</i> | CB361  | <i>Corvus monedula</i> | 1539               | UA                  |
| SAMN08398817 | PRAM00000000 | <i>Campylobacter jejuni</i> | CB363  | <i>Corvus monedula</i> | <b>7841</b>        | UA                  |
| SAMN08398818 | PRAL00000000 | <i>Campylobacter jejuni</i> | CB366  | <i>Corvus monedula</i> | <b>7881</b>        | UA                  |
| SAMN08398819 | PRAK00000000 | <i>Campylobacter jejuni</i> | CB367  | <i>Corvus monedula</i> | 6390               | UA                  |
| SAMN08398820 | PRAJ00000000 | <i>Campylobacter jejuni</i> | CB368  | <i>Corvus monedula</i> | 5543               | UA                  |
| SAMN08398821 | PRAI00000000 | <i>Campylobacter jejuni</i> | CB369  | <i>Corvus monedula</i> | <b>7839</b>        | UA                  |
| SAMN08398822 | PRAH00000000 | <i>Campylobacter jejuni</i> | CB370  | <i>Corvus monedula</i> | <b>7882</b>        | UA                  |
| SAMN08398823 | PRAG00000000 | <i>Campylobacter jejuni</i> | CB371  | <i>Corvus monedula</i> | 4875               | UA                  |
| SAMN08398824 | PRAF00000000 | <i>Campylobacter jejuni</i> | CB372  | <i>Corvus monedula</i> | <b>7847</b>        | UA                  |
| SAMN08398825 | PRAE00000000 | <i>Campylobacter jejuni</i> | CB373  | <i>Corvus monedula</i> | <b>7889</b>        | UA                  |

|              |              |                             |       |                            |             |         |
|--------------|--------------|-----------------------------|-------|----------------------------|-------------|---------|
| SAMN08398826 | PRAD00000000 | <i>Campylobacter jejuni</i> | CB374 | <i>Corvus monedula</i>     | 4875        | UA      |
| SAMN08398827 | PRAC00000000 | <i>Campylobacter jejuni</i> | CB375 | <i>Corvus monedula</i>     | 6428        | UA      |
| SAMN08398828 | PRAB00000000 | <i>Campylobacter jejuni</i> | CB376 | <i>Corvus monedula</i>     | 1282        | UA      |
| SAMN08398829 | PRAA00000000 | <i>Campylobacter jejuni</i> | CB377 | <i>Corvus monedula</i>     | <b>7848</b> | UA      |
| SAMN08398830 | PQZZ00000000 | <i>Campylobacter jejuni</i> | CB378 | <i>Corvus monedula</i>     | 6427        | UA      |
| SAMN08398831 | PQZY00000000 | <i>Campylobacter jejuni</i> | CB379 | <i>Corvus monedula</i>     | <b>7849</b> | UA      |
| SAMN08398832 | PQZX00000000 | <i>Campylobacter jejuni</i> | CB380 | <i>Corvus monedula</i>     | <b>7837</b> | UA      |
| SAMN08398833 | PQZW00000000 | <i>Campylobacter jejuni</i> | CB381 | <i>Corvus monedula</i>     | 3218        | UA      |
| SAMN08398834 | PQZV00000000 | <i>Campylobacter jejuni</i> | CB382 | <i>Corvus monedula</i>     | <b>7891</b> | UA      |
| SAMN08398835 | PQZU00000000 | <i>Campylobacter jejuni</i> | CB383 | <i>Corvus monedula</i>     | <b>7850</b> | UA      |
| SAMN08398836 | PQZT00000000 | <i>Campylobacter jejuni</i> | CB384 | <i>Corvus monedula</i>     | 1282        | UA      |
| SAMN08398837 | PQZS00000000 | <i>Campylobacter jejuni</i> | CB385 | <i>Corvus monedula</i>     | <b>7837</b> | UA      |
| SAMN08398838 | PQZR00000000 | <i>Campylobacter jejuni</i> | CB386 | <i>Corvus monedula</i>     | <b>7893</b> | UA      |
| SAMN08398839 | PQZQ00000000 | <i>Campylobacter jejuni</i> | CB387 | <i>Corvus monedula</i>     | <b>7893</b> | UA      |
| SAMN08398840 | PQZP00000000 | <i>Campylobacter jejuni</i> | CB388 | <i>Corvus monedula</i>     | <b>7851</b> | UA      |
| SAMN08398841 | PQZO00000000 | <i>Campylobacter jejuni</i> | CB389 | <i>Corvus monedula</i>     | <b>8816</b> |         |
| SAMN08398842 | PQZN00000000 | <i>Campylobacter jejuni</i> | CB390 | <i>Corvus monedula</i>     | 5543        | UA      |
| SAMN08398843 | PQZM00000000 | <i>Campylobacter jejuni</i> | CB391 | <i>Corvus monedula</i>     | <b>7895</b> | UA      |
| SAMN08398844 | PQZL00000000 | <i>Campylobacter jejuni</i> | CB393 | <i>Corvus monedula</i>     | <b>7896</b> | UA      |
| SAMN08398881 | PQYA00000000 | <i>Campylobacter jejuni</i> | FA4   | <i>Phasianus colchicus</i> | 19          | ST-21   |
| SAMN08398883 | PQXY00000000 | <i>Campylobacter jejuni</i> | FA45  | <i>Phasianus colchicus</i> | 19          | ST-21   |
| SAMN08398884 | PQXX00000000 | <i>Campylobacter jejuni</i> | FA46  | <i>Phasianus colchicus</i> | 19          | ST-21   |
| SAMN08398882 | PQXZ00000000 | <i>Campylobacter jejuni</i> | FA5   | <i>Phasianus colchicus</i> | 19          | ST-21   |
| SAMN08398885 | PQXW00000000 | <i>Campylobacter jejuni</i> | FA61  | <i>Phasianus colchicus</i> | 19          | ST-21   |
| SAMN08398886 | PQXV00000000 | <i>Campylobacter jejuni</i> | FA63  | <i>Phasianus colchicus</i> | 19          | ST-21   |
| SAMN08398887 | PQXU00000000 | <i>Campylobacter jejuni</i> | FA71  | <i>Phasianus colchicus</i> | 19          | ST-21   |
| SAMN08398888 | PQXT00000000 | <i>Campylobacter jejuni</i> | FA97  | <i>Phasianus colchicus</i> | 19          | ST-21   |
| SAMN08398845 | PQZK00000000 | <i>Campylobacter jejuni</i> | SO-12 | <i>Anas platyrhynchos</i>  | 6788        | ST-1332 |
| SAMN08398846 | PQZJ00000000 | <i>Campylobacter jejuni</i> | SO-14 | <i>Anas platyrhynchos</i>  | 4776        | ST-692  |
| SAMN08398847 | PQZI00000000 | <i>Campylobacter jejuni</i> | SO-16 | <i>Anas platyrhynchos</i>  | 692         | ST-692  |
| SAMN08398848 | PQZH00000000 | <i>Campylobacter jejuni</i> | SO-17 | <i>Anas platyrhynchos</i>  | <b>7842</b> | ST-692  |
| SAMN08398849 | PQZG00000000 | <i>Campylobacter jejuni</i> | SO-19 | <i>Anas platyrhynchos</i>  | 692         | ST-692  |
| SAMN08398850 | PQZF00000000 | <i>Campylobacter jejuni</i> | SO-21 | <i>Anas platyrhynchos</i>  | 2839        | UA      |
| SAMN08398851 | PQZE00000000 | <i>Campylobacter jejuni</i> | SO-22 | <i>Anas platyrhynchos</i>  | 2839        | UA      |
| SAMN08398852 | PQZD00000000 | <i>Campylobacter jejuni</i> | SO-26 | <i>Anas platyrhynchos</i>  | 4776        | ST-692  |
| SAMN08398853 | PQZC00000000 | <i>Campylobacter jejuni</i> | SO-28 | <i>Anas platyrhynchos</i>  | 2314        | ST-1034 |
| SAMN08398854 | PQZB00000000 | <i>Campylobacter jejuni</i> | SO-29 | <i>Anas platyrhynchos</i>  | 991         | ST-692  |
| SAMN08398855 | PQZA00000000 | <i>Campylobacter jejuni</i> | SO-37 | <i>Anas platyrhynchos</i>  | 2839        | UA      |
| SAMN08398856 | PQZY00000000 | <i>Campylobacter jejuni</i> | SO-39 | <i>Anas platyrhynchos</i>  | 995         | UA      |
| SAMN08398857 | PQYY00000000 | <i>Campylobacter jejuni</i> | SO-4  | <i>Anas platyrhynchos</i>  | 1299        | ST-1034 |
| SAMN08398858 | PQYX00000000 | <i>Campylobacter jejuni</i> | SO-49 | <i>Anas platyrhynchos</i>  | 2314        | ST-1034 |
| SAMN08398859 | PQYW00000000 | <i>Campylobacter jejuni</i> | SO-50 | <i>Anas platyrhynchos</i>  | 2354        | UA      |
| SAMN08398860 | PQYV00000000 | <i>Campylobacter jejuni</i> | SO-54 | <i>Anas platyrhynchos</i>  | 2839        | UA      |
| SAMN08398861 | PQYU00000000 | <i>Campylobacter jejuni</i> | SO-55 | <i>Anas platyrhynchos</i>  | 2314        | ST-1034 |
| SAMN08398862 | PQYT00000000 | <i>Campylobacter jejuni</i> | SO-64 | <i>Anas platyrhynchos</i>  | 693         | UA      |
| SAMN08398863 | PQYS00000000 | <i>Campylobacter jejuni</i> | SO-67 | <i>Anas platyrhynchos</i>  | 1299        | ST-1034 |
| SAMN08398864 | PQYR00000000 | <i>Campylobacter jejuni</i> | SO-68 | <i>Anas platyrhynchos</i>  | <b>7843</b> | UA      |
| SAMN08398865 | PQYQ00000000 | <i>Campylobacter jejuni</i> | SO-71 | <i>Anas platyrhynchos</i>  | 693         | UA      |
| SAMN08398866 | PQYP00000000 | <i>Campylobacter jejuni</i> | SO-72 | <i>Anas platyrhynchos</i>  | 2314        | ST-1034 |
| SAMN08398867 | PQYO00000000 | <i>Campylobacter jejuni</i> | SO-73 | <i>Anas platyrhynchos</i>  | 1030        | UA      |
| SAMN08398868 | PQYN00000000 | <i>Campylobacter jejuni</i> | SO-74 | <i>Anas platyrhynchos</i>  | 1030        | UA      |
| SAMN08398869 | PQYM00000000 | <i>Campylobacter jejuni</i> | SO-75 | <i>Anas platyrhynchos</i>  | 995         | UA      |
| SAMN08398870 | PQYL00000000 | <i>Campylobacter jejuni</i> | SO-76 | <i>Anas platyrhynchos</i>  | <b>7844</b> | UA      |
| SAMN08398871 | PQYK00000000 | <i>Campylobacter jejuni</i> | SO-79 | <i>Anas platyrhynchos</i>  | 704         | UA      |
| SAMN08398872 | PQYJ00000000 | <i>Campylobacter jejuni</i> | SO-8  | <i>Anas platyrhynchos</i>  | 991         | ST-692  |
| SAMN08398873 | PQYI00000000 | <i>Campylobacter jejuni</i> | SO-80 | <i>Anas platyrhynchos</i>  | 704         | UA      |
| SAMN08398874 | PQYH00000000 | <i>Campylobacter jejuni</i> | SO-85 | <i>Anas platyrhynchos</i>  | 991         | ST-692  |
| SAMN08398875 | PQYG00000000 | <i>Campylobacter jejuni</i> | SO-89 | <i>Anas platyrhynchos</i>  | 2314        | ST-1034 |
| SAMN08398876 | PQYF00000000 | <i>Campylobacter jejuni</i> | SO-92 | <i>Anas platyrhynchos</i>  | <b>7809</b> | ST-1034 |
| SAMN08398877 | PQYE00000000 | <i>Campylobacter jejuni</i> | SO-96 | <i>Anas platyrhynchos</i>  | 995         | UA      |
| SAMN08398878 | PQYD00000000 | <i>Campylobacter jejuni</i> | SS5R  | <i>Anas platyrhynchos</i>  | 995         | UA      |
| SAMN08398879 | PQYC00000000 | <i>Campylobacter jejuni</i> | SS6R  | <i>Anas platyrhynchos</i>  | 6228        | ST-952  |
| SAMN08398880 | PQYB00000000 | <i>Campylobacter jejuni</i> | SS7R  | <i>Anas platyrhynchos</i>  | 995         | UA      |

Tree scale: 0.01

- Chicken
- Turkey
- Bovine
- Western jackdaw
- American crow
- Mallard duck
- Pheasant
- Barnacle goose
- Sandhill crane
- Other (Mammals)

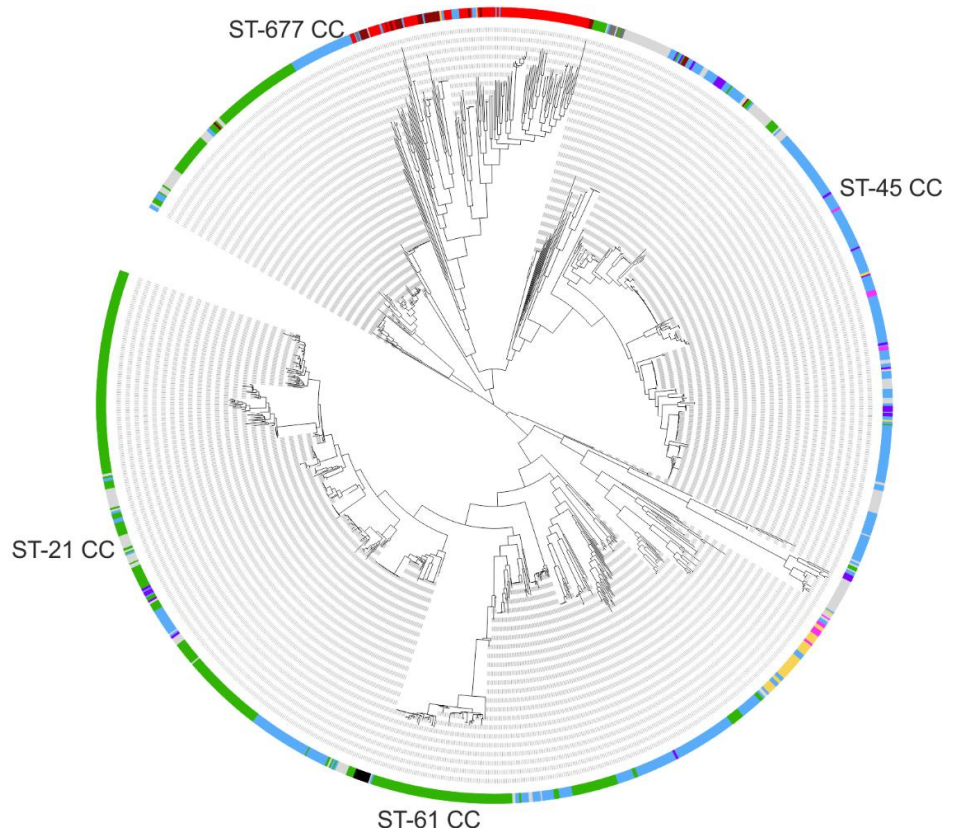

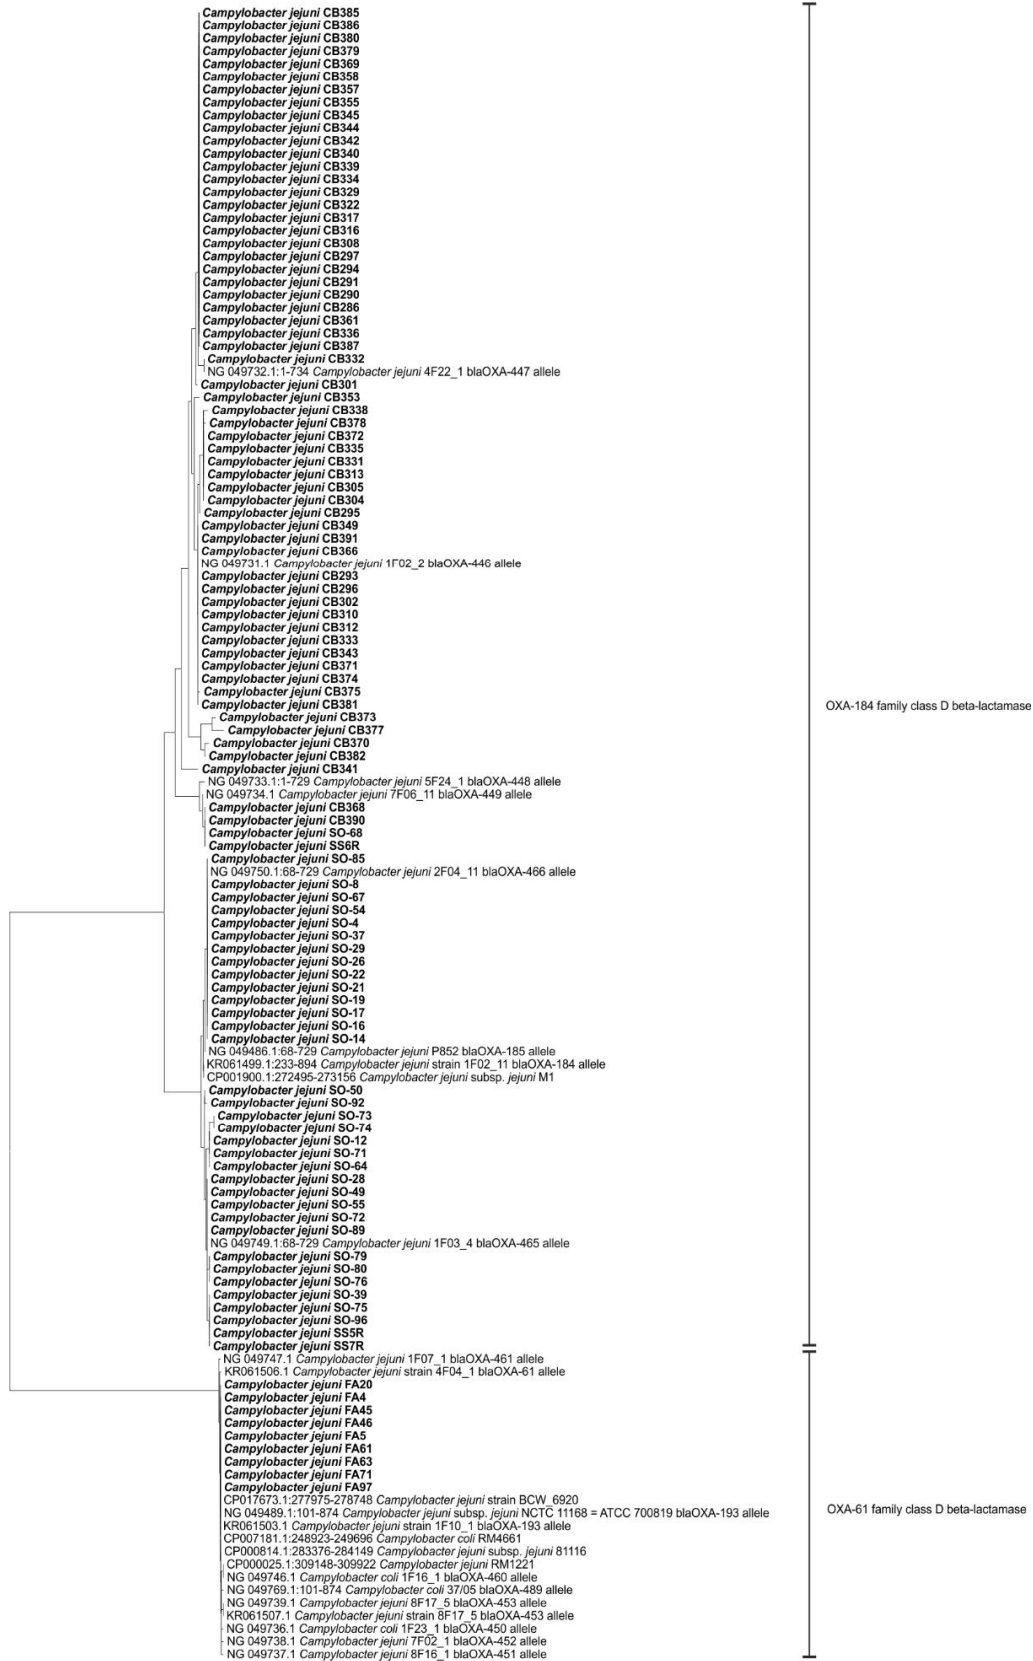

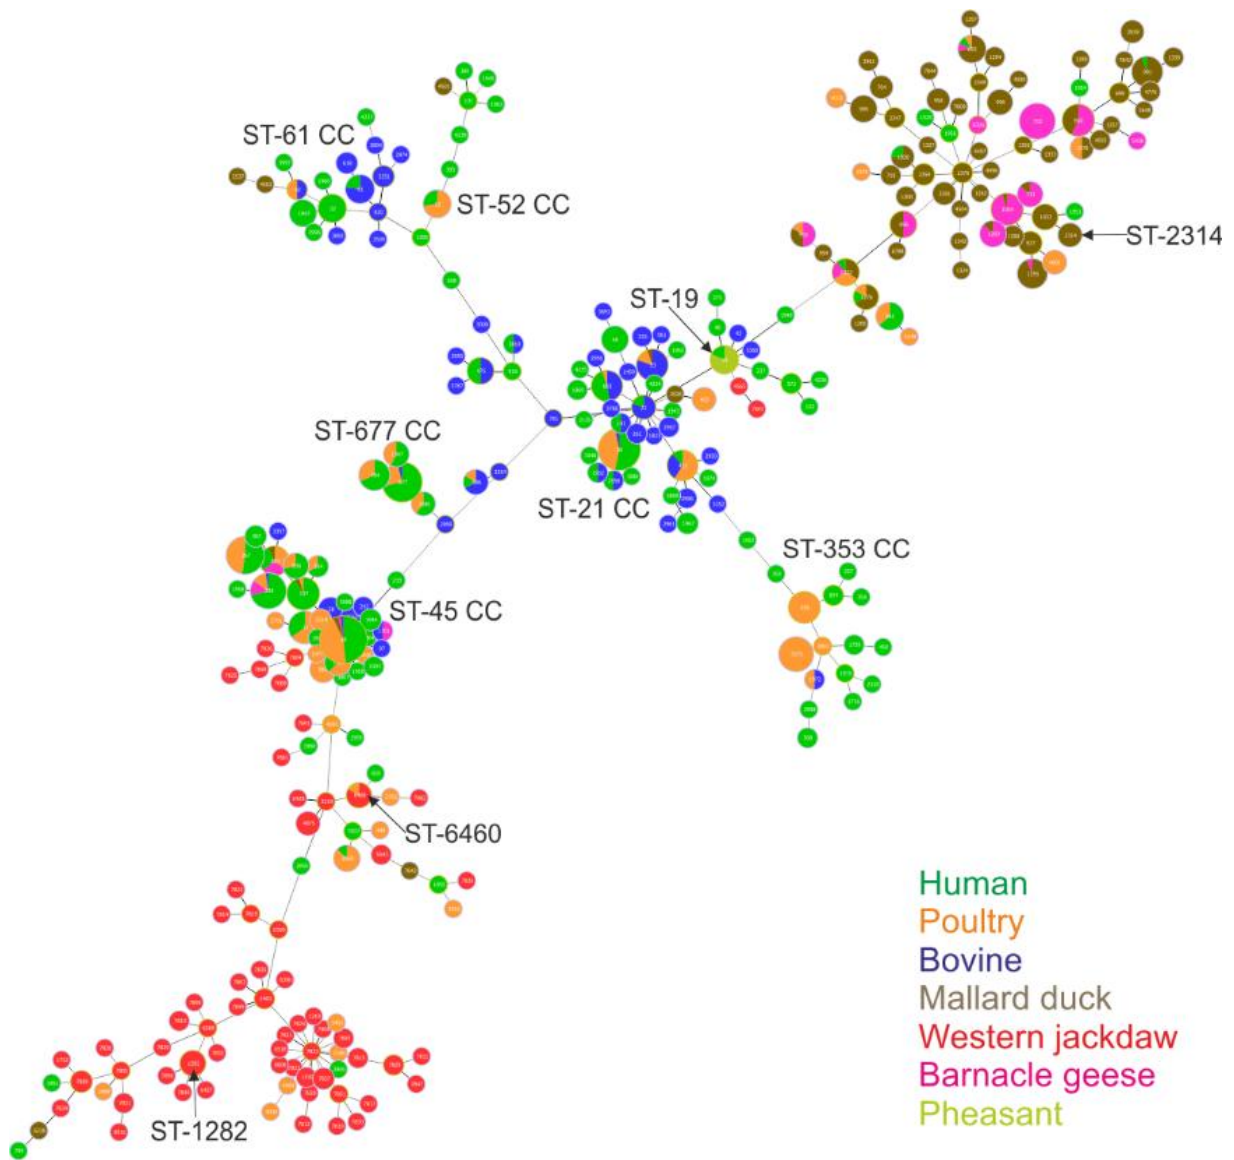

Supplement: 2c6f6d0371bcf645d80653b8ebf7ad3c_AEM.02365-18-s0001.pdf [file 2c6f6d0371bcf645d80653b8ebf7ad3c_AEM.02365-18-s0001.pdf]
